# Supplementary material for: Ensemble model for estimating continental-scale patterns of human movement: a case study of Australia
Source: PubMed Central journal article supplement (PMC7910534; doi:10.1038/s41598-021-84198-6), 2021-02-26
Supplement: 41598_2021_84198_MOESM1_ESM.pdf [file 41598_2021_84198_MOESM1_ESM.pdf]

# **SUPPLEMENTARY MATERIAL**

## **Ensemble model for estimating continental-scale patterns of human movement: a case study of Australia**

**Karen McCulloch<sup>1,2,\*</sup>, Nick Golding<sup>3</sup>, Jodie McVernon<sup>1,4,5</sup>, Sarah Goodwin<sup>6</sup>, and Martin Tomko<sup>7,\*</sup>**

<sup>1</sup>Victorian Infectious Diseases Reference Laboratory, Royal Melbourne Hospital, at The Peter Doherty Institute for Infection and Immunity, Parkville, VIC, Australia.

<sup>2</sup>Doherty Department, University of Melbourne, at The Peter Doherty Institute for Infection and Immunity, Parkville, VIC, Australia.

<sup>3</sup>School of Biosciences, The University of Melbourne, Parkville, VIC, Australia.

<sup>4</sup>Centre for Epidemiology and Statistics, Melbourne School of Population and Global Health, The University of Melbourne

<sup>5</sup>Infection Modelling, Murdoch Children's Research Institute

<sup>6</sup>Faculty of Information Technology, Monash University, Caulfield, VIC, Australia.

<sup>7</sup>Melbourne School of Engineering, The University of Melbourne, Parkville, VIC, Australia.

\*Corresponding authors: karen.mcculloch@unimelb.edu.au, tomkom@unimelb.edu.au

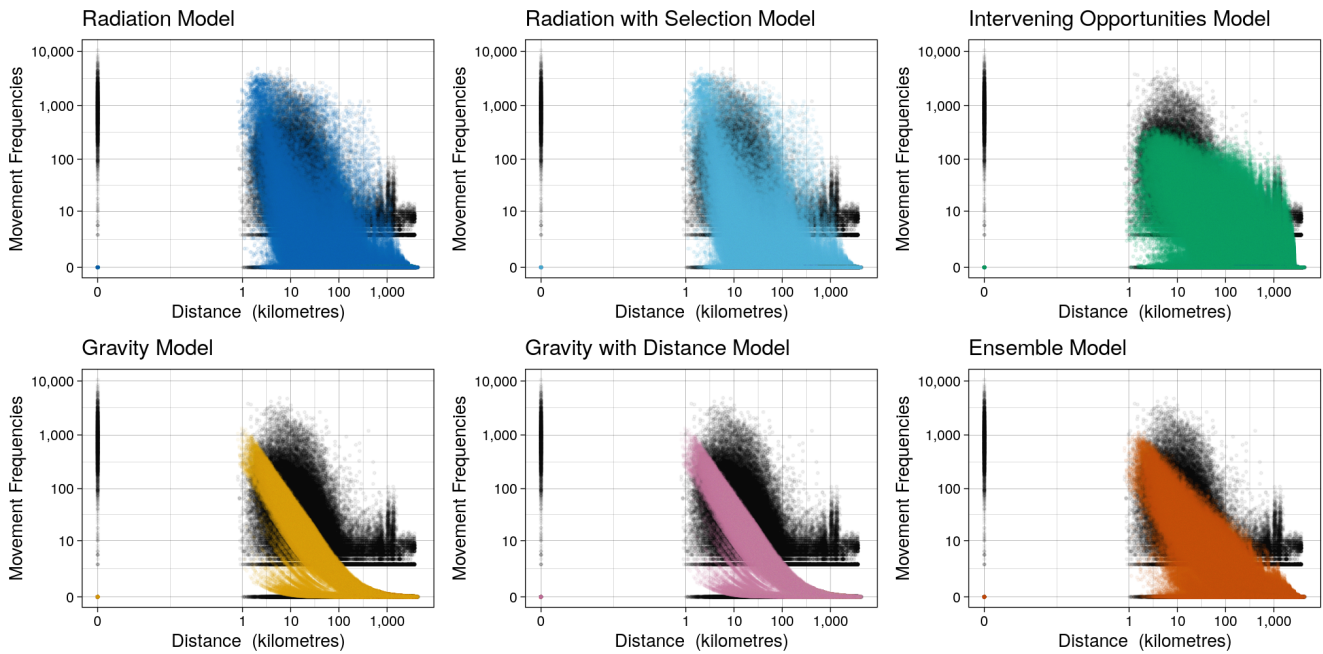

**Figure S1.** Comparison of predicted frequency of movements by distance (kilometres) between pairs of locations for each model type, based on census data for the whole of Australia. Black points show the raw movement frequencies that were used to train each model. Coloured points show the resulting model predictions. Movement frequency and distance are shown on a log-scale to better highlight differences between model predictions.

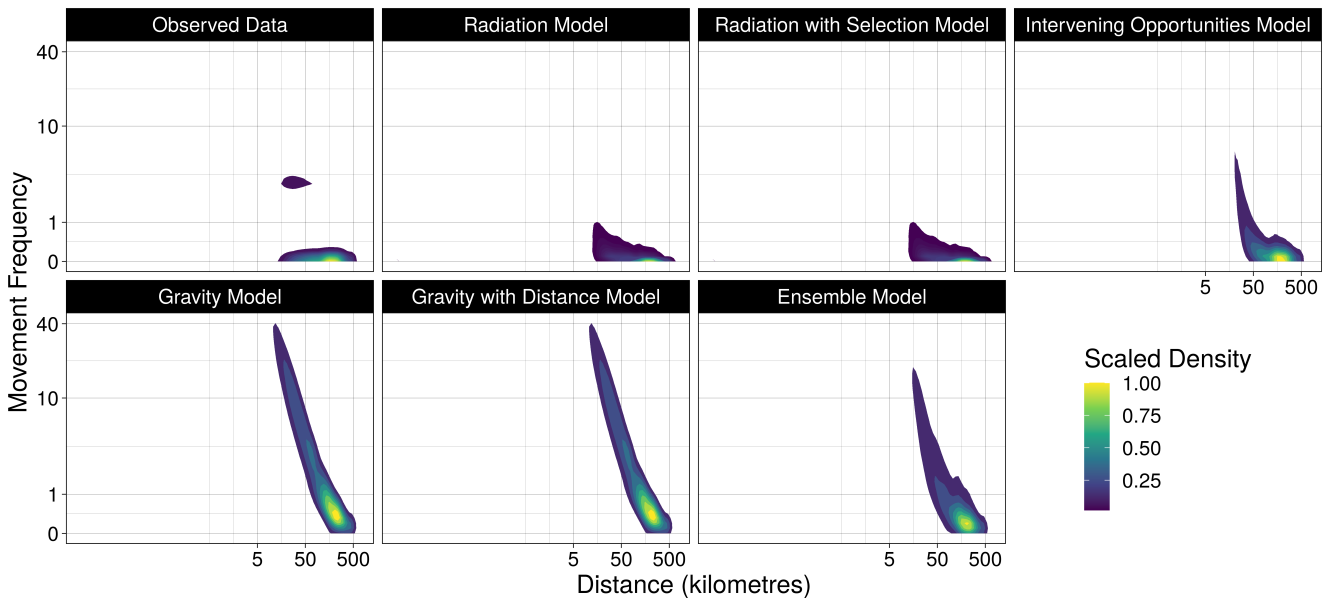

**Figure S2.** Kernel density estimates of the observed data and predictions from each movement model. Density estimates have been re-scaled to have a maximum of 1. Movement frequency and distance are shown on a log-scale. These provide insight into where the majority of predicted values lie, in comparison to the observed data and provides an alternative view to the same data illustrated in Figure 1 of the manuscript.

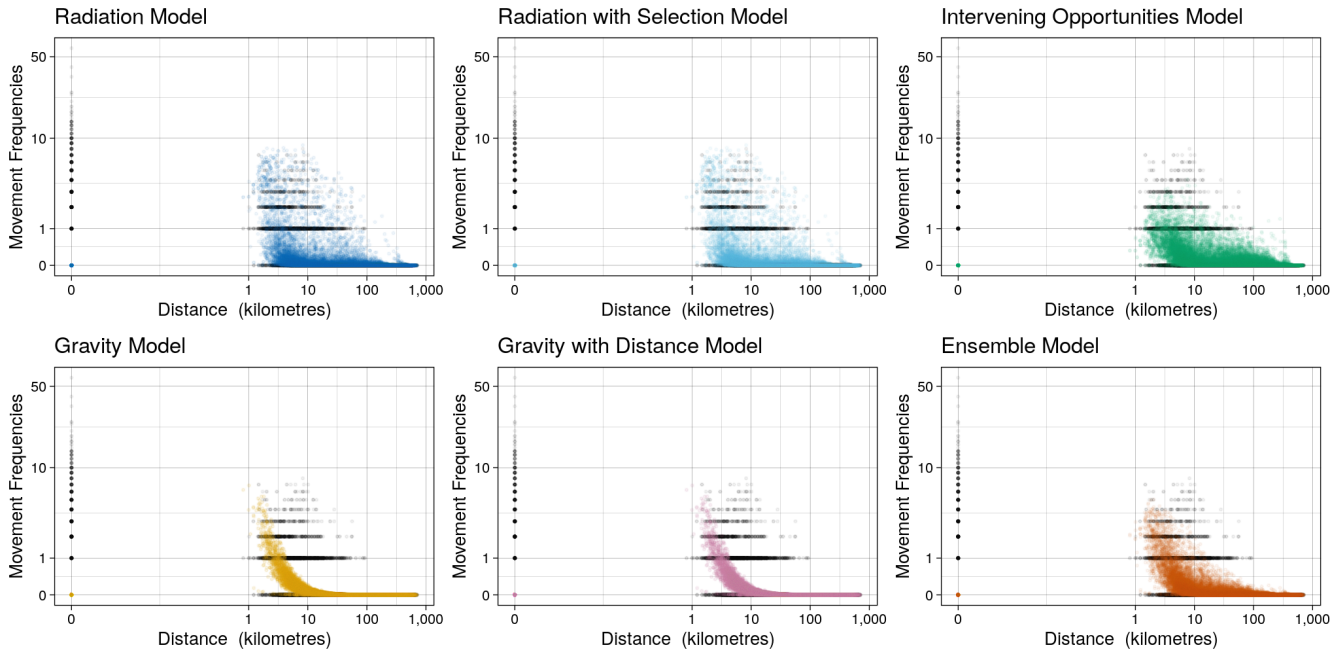

**Figure S3.** Comparison of predicted frequency of movements by distance (kilometres) between pairs of locations for each model type, based on GPS data for the Australian state of Victoria. Black points show the raw movement frequencies that were used to train each model. Coloured points show the resulting model predictions. Movement frequency and distance are shown on a log-scale to better highlight differences between model predictions.

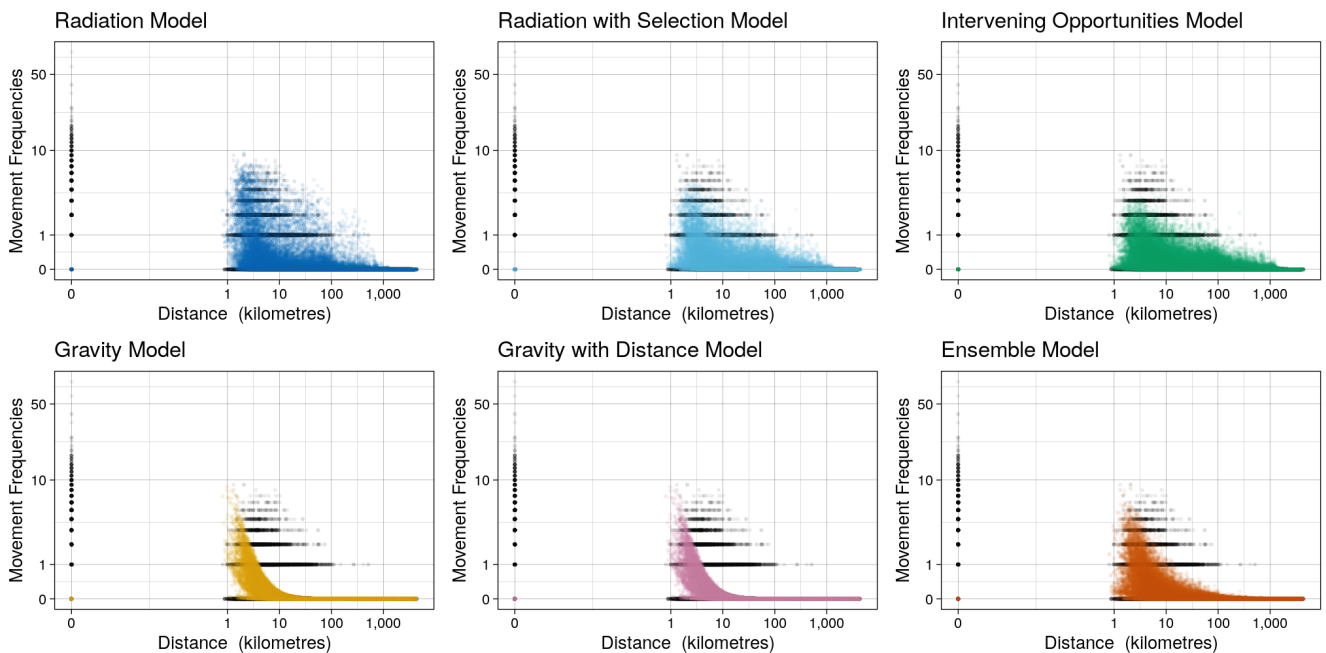

**Figure S4.** Comparison of predicted frequency of movements by distance (kilometres) between pairs of locations for each model type, based on GPS data for the whole of Australia. Black points show the raw movement frequencies that were used to train each model. Coloured points show the resulting model predictions. Movement frequency and distance are shown on a log-scale to better highlight differences between model predictions.

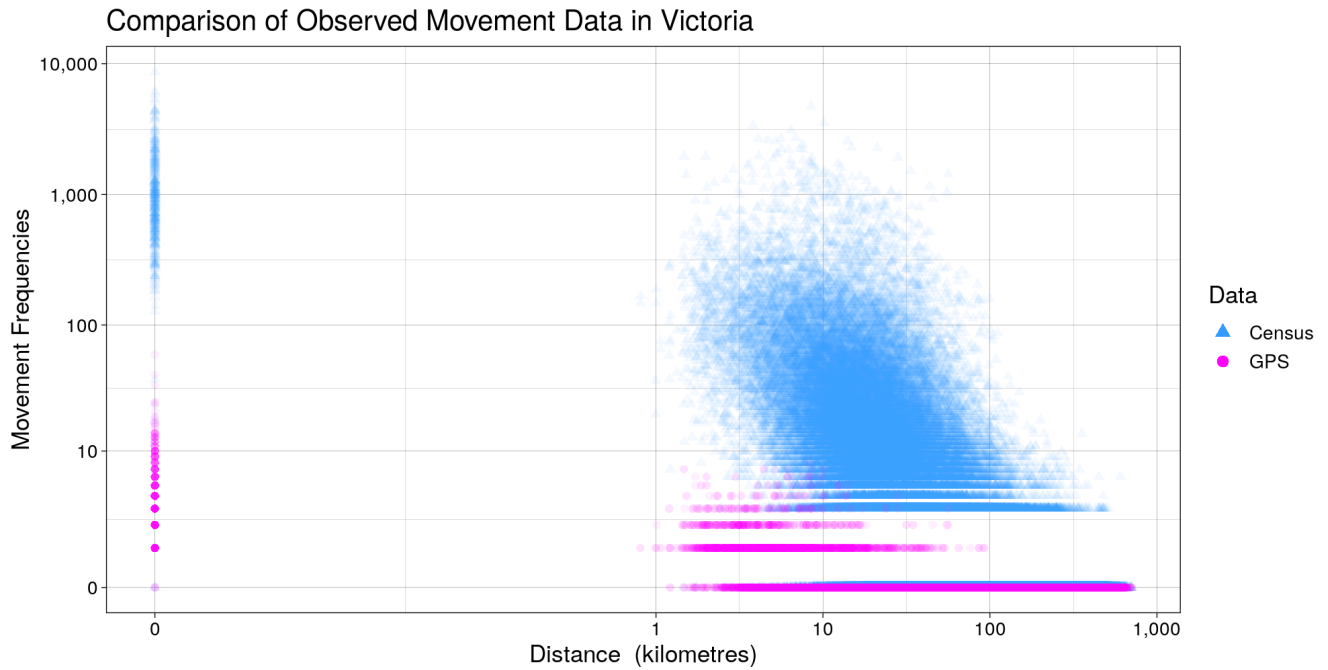

**Figure S5.** Comparison of observed frequency of movements by distance (kilometres) between pairs of locations for ABS census and GPS data for the Australian state of Victoria. Movement frequency and distance are shown on a log-scale.

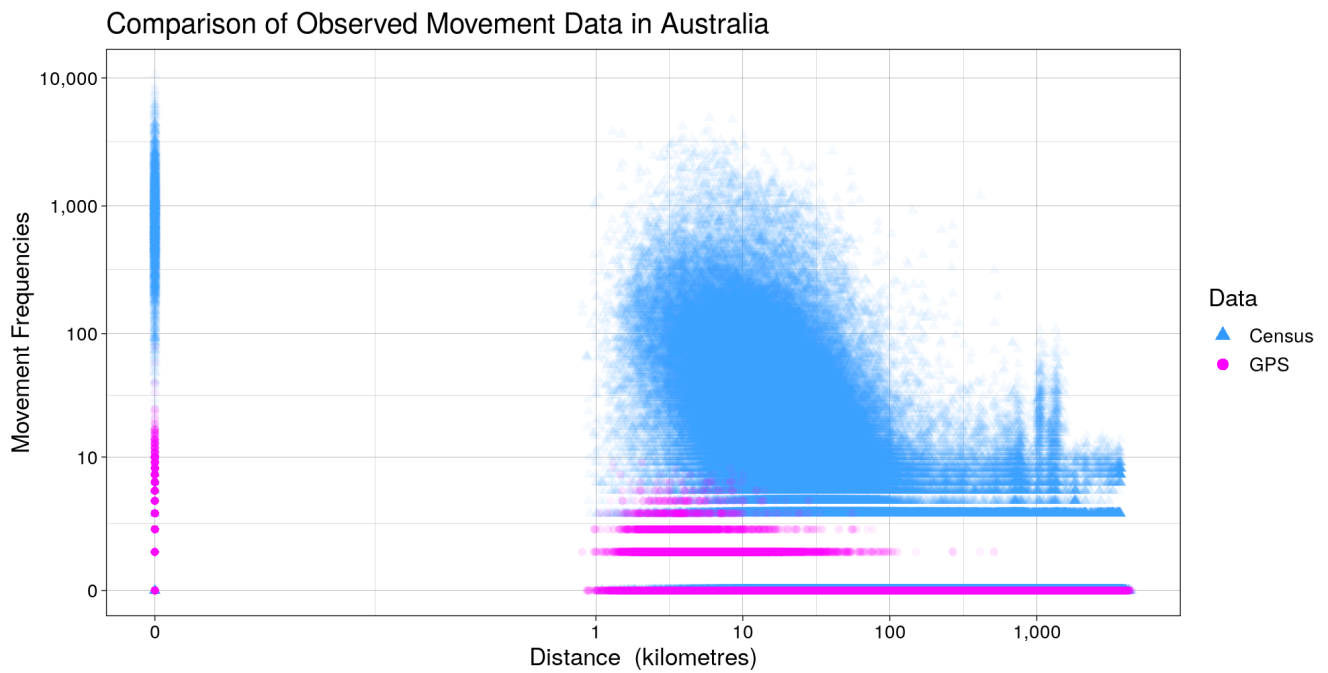

**Figure S6.** Comparison of observed frequency of movements by distance (kilometres) between pairs of locations for ABS census and GPS data for the whole of Australia. Movement frequency and distance are shown on a log-scale.

### Cross validation results

In the following tables, 'Fold *i*' refers to the section of data that was left out of the model training process and the model predictions were generated for 'Fold *i*' in order to see how well the model performs. The Poisson Deviance for ABS census Victorian and Australian scale predictions are given in Tables S1 and S2 respectively. The Poisson Deviance for GPS Victorian and Australian scale predictions are given in Tables S3 and S4 respectively. For each model type, the Poisson deviance was calculated by comparing the predicted movements for entries in each fold which was used to 'test' the model with the corresponding observed values. Tables S5 to S8 provide estimates of model parameters resulting from 5-fold cross validation.

**Table S1.** Poisson Deviance for 5-fold cross validation using ABS Journey to Work Data: Victorian predictions

| Model type                | Poisson Deviance |         |         |         |         | Mean    | SD    |
|---------------------------|------------------|---------|---------|---------|---------|---------|-------|
|                           | Fold 1           | Fold 2  | Fold 3  | Fold 4  | Fold 5  |         |       |
| Gravity                   | 870325           | 860764  | 891147  | 831357  | 872689  | 865256  | 19599 |
| Gravity with Distance     | 870089           | 860766  | 891147  | 806221  | 872690  | 860183  | 28725 |
| Radiation                 | 1630733          | 1647624 | 1607337 | 1521502 | 1582722 | 1597984 | 44060 |
| Radiation with Selection  | 1630692          | 1647591 | 1607299 | 1521463 | 1582692 | 1597947 | 44061 |
| Intervening Opportunities | 824134           | 848359  | 855658  | 795802  | 826219  | 830034  | 21041 |
| Ensemble                  | 692228           | 696618  | 713112  | 608097  | 700741  | 682159  | 37680 |

**Table S2.** Poisson Deviance for 5-fold cross validation using ABS Journey to Work Data: Australian predictions

| Model type                | Poisson Deviance |         |         |         |         | Mean    | SD     |
|---------------------------|------------------|---------|---------|---------|---------|---------|--------|
|                           | Fold 1           | Fold 2  | Fold 3  | Fold 4  | Fold 5  |         |        |
| Gravity                   | 3776069          | 3590674 | 3870622 | 3658351 | 3860812 | 3751306 | 110711 |
| Gravity with Distance     | 3774959          | 3590669 | 3870630 | 3658349 | 3860805 | 3751082 | 110664 |
| Radiation                 | 6855272          | 6525158 | 6782895 | 6612122 | 6704687 | 6696027 | 117657 |
| Radiation with Selection  | 6855101          | 6524986 | 6782718 | 6611954 | 6704509 | 6695853 | 117656 |
| Intervening Opportunities | 4630580          | 4267374 | 4633080 | 4391866 | 4565793 | 4497739 | 144826 |
| Ensemble                  | 3246282          | 3090159 | 3318033 | 3082473 | 3297156 | 3206821 | 101151 |

**Table S3.** Poisson Deviance for 5-fold cross validation using GPS Data: Victorian predictions

| Model type                | Poisson Deviance |        |        |        |        |      |     |
|---------------------------|------------------|--------|--------|--------|--------|------|-----|
|                           | Fold 1           | Fold 2 | Fold 3 | Fold 4 | Fold 5 | Mean | SD  |
| Gravity                   | 3692             | 3623   | 3911   | 3741   | 3446   | 3683 | 152 |
| Gravity with Distance     | 3692             | 3623   | 3911   | 3741   | 3446   | 3683 | 152 |
| Radiation                 | 3477             | 3459   | 3443   | 3303   | 3126   | 3362 | 133 |
| Radiation with Selection  | 3477             | 3459   | 3443   | 3303   | 3126   | 3361 | 133 |
| Intervening Opportunities | 3078             | 3182   | 3191   | 3048   | 2843   | 3068 | 126 |
| Ensemble                  | 2800             | 2826   | 2846   | 2764   | 2592   | 2766 | 91  |

**Table S4.** Poisson Deviance for 5-fold cross validation using GPS Data: Australian predictions

| Model type                | Poisson Deviance |        |        |        |        |       |     |
|---------------------------|------------------|--------|--------|--------|--------|-------|-----|
|                           | Fold 1           | Fold 2 | Fold 3 | Fold 4 | Fold 5 | Mean  | SD  |
| Gravity                   | 13366            | 12925  | 13043  | 13078  | 13503  | 13183 | 216 |
| Gravity with Distance     | 13366            | 12925  | 13043  | 13078  | 13503  | 13183 | 216 |
| Radiation                 | 13681            | 12770  | 12761  | 12971  | 13664  | 13169 | 418 |
| Radiation with Selection  | 11824            | 11258  | 11223  | 11450  | 11937  | 11538 | 292 |
| Intervening Opportunities | 12520            | 11791  | 11864  | 11975  | 12602  | 12150 | 341 |
| Ensemble                  | 10890            | 10373  | 10362  | 10561  | 11002  | 10638 | 264 |

**Table S5.** Estimated model parameters for 5-fold cross validation using Victorian Census Data

| <b>Gravity Model</b>                   |             |              |             |             |             |              |             |
|----------------------------------------|-------------|--------------|-------------|-------------|-------------|--------------|-------------|
| <b>Parameter</b>                       | Fold 1      | Fold 2       | Fold 3      | Fold 4      | Fold 5      | Mean         | SD          |
| $\theta$                               | 542.712480  | 499.144061   | 488.135616  | 393.037832  | 524.705711  | 489.547140   | 58.031927   |
| $\alpha$                               | 0.808379    | 0.785586     | 0.818792    | 0.811822    | 0.789987    | 0.802913     | 0.014393    |
| $\beta$                                | 0.216192    | 0.240847     | 0.212439    | 0.242781    | 0.232759    | 0.229004     | 0.013989    |
| $\gamma$                               | 1.346332    | 1.339467     | 1.342627    | 1.341927    | 1.341119    | 1.342295     | 0.002546    |
| <b>Gravity with Distance Model</b>     |             |              |             |             |             |              |             |
| <b>Parameter</b>                       | Fold 1      | Fold 2       | Fold 3      | Fold 4      | Fold 5      | Mean         | SD          |
| $\theta_1$                             | 0.000007    | 0.000007     | 0.000007    | 0.000016    | 0.000007    | 0.000009     | 0.000004    |
| $\alpha_1$                             | 0.802870    | 0.785559     | 0.818791    | 0.831886    | 0.789861    | 0.805793     | 0.019504    |
| $\beta_1$                              | 0.228933    | 0.240874     | 0.212451    | 0.200810    | 0.232725    | 0.223158     | 0.016223    |
| $\gamma_1$                             | 1.342161    | 1.339331     | 1.342489    | 1.162651    | 1.341105    | 1.305547     | 0.079891    |
| $\delta$                               | 1.000000    | 0.989783     | 0.930096    | 0.058061    | 0.911853    | 0.777958     | 0.404196    |
| $\theta_2$                             | 0.161209    | 0.108526     | 0.000001    | 0.000274    | 0.000000    | 0.054002     | 0.076134    |
| $\alpha_2$                             | -14.506976  | -16.796865   | 7.645935    | 0.086391    | 1.516347    | -4.411033    | 10.677875   |
| $\beta_2$                              | 3.985797    | 15.505577    | -7.779967   | 0.131058    | 0.474889    | 2.463471     | 8.466650    |
| $\gamma_2$                             | 4.845840    | 7.319459     | -17.767873  | 2.775484    | 54.404259   | 10.315434    | 26.590599   |
| <b>Radiation Model</b>                 |             |              |             |             |             |              |             |
| <b>Parameter</b>                       | Fold 1      | Fold 2       | Fold 3      | Fold 4      | Fold 5      | Mean         | SD          |
| $\theta$                               | 0.315004083 | 0.3076516    | 0.313452558 | 0.314459162 | 0.304971306 | 0.311107742  | 0.004514212 |
| <b>Radiation with Selection Model</b>  |             |              |             |             |             |              |             |
| <b>Parameter</b>                       | Fold 1      | Fold 2       | Fold 3      | Fold 4      | Fold 5      | Mean         | SD          |
| $\theta$                               | 0.314978    | 0.307629     | 0.313428    | 0.314426    | 0.304948    | 0.311082     | 0.004511    |
| $\lambda$                              | 0.200000    | 0.200000     | 0.200000    | 0.200000    | 0.200000    | 0.200000     | 0.000000    |
| <b>Intervening Opportunities Model</b> |             |              |             |             |             |              |             |
| <b>Parameter</b>                       | Fold 1      | Fold 2       | Fold 3      | Fold 4      | Fold 5      | Mean         | SD          |
| $\theta$                               | 0.309864    | 0.310164     | 0.309060    | 0.312617    | 0.309123    | 0.310166     | 0.001450    |
| $\lambda$                              | 0.000002    | 0.000002     | 0.000002    | 0.000002    | 0.000002    | 0.000002     | 0.000000    |
| <b>Ensemble Model</b>                  |             |              |             |             |             |              |             |
| <b>Parameter</b>                       | Fold 1      | Fold 2       | Fold 3      | Fold 4      | Fold 5      | Mean         | SD          |
| $\beta_0$                              | 0.923029    | 3.169985     | 0.817638    | 1.297922    | 0.850761    | 1.411867     | 1.001358    |
| $\beta_1$                              | 29.073101   | 7266.023944  | 0.269440    | -1.158809   | -0.404345   | 1458.760666  | 3246.384041 |
| $\beta_2$                              | -28.842227  | -7266.443796 | 0.053296    | 1.371873    | 0.724193    | -1458.627332 | 3246.693366 |
| $\beta_3$                              | 39.724399   | 4347.731061  | 721.938934  | 713.768329  | 821.819530  | 1328.996451  | 1716.044432 |
| $\beta_4$                              | -39.542180  | -4347.616698 | -721.748239 | -713.491169 | -821.624113 | -1328.804480 | 1716.084509 |
| $\beta_5$                              | 0.432037    | 0.523710     | 0.375344    | 0.295491    | 0.366879    | 0.398692     | 0.085072    |

**Table S6.** Estimated model parameters for 5-fold cross validation using Australian Census Data

| Parameter  | Gravity Model                   |              |              |              |              | Mean         | SD          |
|------------|---------------------------------|--------------|--------------|--------------|--------------|--------------|-------------|
|            | Fold 1                          | Fold 2       | Fold 3       | Fold 4       | Fold 5       |              |             |
| $\theta$   | 12102.063283                    | 11166.914934 | 11714.262980 | 10831.379919 | 11769.495746 | 11516.823372 | 509.313293  |
| $\alpha$   | 0.712173                        | 0.732644     | 0.718555     | 0.734691     | 0.729526     | 0.725518     | 0.009716    |
| $\beta$    | 0.041046                        | 0.034399     | 0.036477     | 0.033969     | 0.031932     | 0.035565     | 0.003464    |
| $\gamma$   | 1.392653                        | 1.397228     | 1.391889     | 1.396035     | 1.397978     | 1.395157     | 0.002737    |
| Parameter  | Gravity with Distance Model     |              |              |              |              | Mean         | SD          |
|            | Fold 1                          | Fold 2       | Fold 3       | Fold 4       | Fold 5       |              |             |
| $\theta_1$ | 0.000006                        | 0.000006     | 0.000007     | 0.000006     | 0.000006     | 0.000006     | 0.000000    |
| $\alpha_1$ | 0.725542                        | 0.732618     | 0.718554     | 0.734600     | 0.729507     | 0.728164     | 0.006370    |
| $\beta_1$  | 0.035521                        | 0.034402     | 0.036486     | 0.033892     | 0.031932     | 0.034447     | 0.001728    |
| $\gamma_1$ | 1.395046                        | 1.397114     | 1.391755     | 1.395938     | 1.397877     | 1.395546     | 0.002380    |
| $\delta$   | 0.926831                        | 1.000000     | 0.999945     | 1.000000     | 0.999999     | 0.985355     | 0.032716    |
| $\theta_2$ | 0.000016                        | 0.000000     | 0.000000     | 0.000000     | 0.000000     | 0.000003     | 0.000007    |
| $\alpha_2$ | -8.595269                       | 2.822226     | 40.533528    | 22.677423    | 17.374756    | 14.962533    | 18.851865   |
| $\beta_2$  | -4.489471                       | 23.165282    | -0.860610    | 1.869413     | 22.456325    | 8.428188     | 13.324186   |
| $\gamma_2$ | 341.903571                      | -126.802012  | -148.718315  | -352.821063  | -158.574976  | -89.002559   | 257.446785  |
| Parameter  | Radiation Model                 |              |              |              |              | Mean         | SD          |
|            | Fold 1                          | Fold 2       | Fold 3       | Fold 4       | Fold 5       |              |             |
| $\theta$   | 0.306963                        | 0.310690     | 0.306078     | 0.307311     | 0.307139     | 0.307636     | 0.001772    |
| Parameter  | Radiation with Selection Model  |              |              |              |              | Mean         | SD          |
|            | Fold 1                          | Fold 2       | Fold 3       | Fold 4       | Fold 5       |              |             |
| $\theta$   | 0.306958                        | 0.310683     | 0.306072     | 0.307305     | 0.307134     | 0.307630     | 0.001771    |
| $\lambda$  | 0.204873                        | 0.201590     | 0.200013     | 0.200144     | 0.200683     | 0.201461     | 0.002006    |
| Parameter  | Intervening Opportunities Model |              |              |              |              | Mean         | SD          |
|            | Fold 1                          | Fold 2       | Fold 3       | Fold 4       | Fold 5       |              |             |
| $\theta$   | 0.306711                        | 0.310133     | 0.305162     | 0.308583     | 0.306580     | 0.307434     | 0.001938    |
| $\lambda$  | 0.000002                        | 0.000002     | 0.000002     | 0.000002     | 0.000002     | 0.000002     | 0.000000    |
| Parameter  | Ensemble Model                  |              |              |              |              | Mean         | SD          |
|            | Fold 1                          | Fold 2       | Fold 3       | Fold 4       | Fold 5       |              |             |
| $\beta_0$  | 1.147783                        | 2.058024     | 1.652175     | -0.566816    | 1.570570     | 1.172347     | 1.024516    |
| $\beta_1$  | -27.549991                      | 4000.096214  | 2254.309500  | -4643.331072 | 2766.619779  | 870.028886   | 3410.036553 |
| $\beta_2$  | 27.929339                       | -3999.948091 | -2254.046321 | 4644.106838  | -2766.342125 | -869.660072  | 3410.275776 |
| $\beta_3$  | -16.132971                      | 53.502781    | 52.937247    | 65.056935    | 50.684692    | 41.209737    | 32.539604   |
| $\beta_4$  | 16.348850                       | -53.299448   | -52.740149   | -64.869276   | -50.484834   | -41.008971   | 32.548818   |
| $\beta_5$  | 0.204413                        | 0.205276     | 0.213030     | 0.302958     | 0.201745     | 0.225484     | 0.043512    |



**Table S7.** Estimated model parameters for 5-fold cross validation using Victorian GPS Data

| Parameter | Gravity Model |           |           |          |           | Mean      | SD       |
|-----------|---------------|-----------|-----------|----------|-----------|-----------|----------|
|           | Fold 1        | Fold 2    | Fold 3    | Fold 4   | Fold 5    |           |          |
| $\theta$  | 25.384241     | 21.837919 | 20.532605 | 7.268214 | 34.260003 | 21.856597 | 9.757856 |
| $\alpha$  | 0.755681      | 0.732994  | 0.747706  | 0.755619 | 0.688272  | 0.736054  | 0.028268 |
| $\beta$   | 0.668351      | 0.699855  | 0.704591  | 0.808617 | 0.700702  | 0.716423  | 0.053555 |
| $\gamma$  | 2.114622      | 2.107197  | 2.123654  | 2.125910 | 2.109196  | 2.116116  | 0.008403 |

  

| Parameter  | Gravity with Distance Model |            |            |           |           | Mean      | SD        |
|------------|-----------------------------|------------|------------|-----------|-----------|-----------|-----------|
|            | Fold 1                      | Fold 2     | Fold 3     | Fold 4    | Fold 5    |           |           |
| $\theta_1$ | 0.000000                    | 0.000000   | 0.000000   | 0.000000  | 0.000000  | 0.000000  | 0.000000  |
| $\alpha_1$ | 0.756136                    | 0.732701   | 0.747675   | 0.755591  | 0.688233  | 0.736067  | 0.028364  |
| $\beta_1$  | 0.669128                    | 0.699632   | 0.704561   | 0.808537  | 0.700645  | 0.716501  | 0.053370  |
| $\gamma_1$ | 2.114680                    | 2.107104   | 2.123498   | 2.125734  | 2.109042  | 2.116012  | 0.008370  |
| $\delta$   | 1.000000                    | 1.000000   | 1.000000   | 1.000000  | 1.000000  | 1.000000  | 0.000000  |
| $\theta_2$ | 0.000016                    | 0.000000   | 0.000084   | 0.000024  | 0.051650  | 0.010355  | 0.023085  |
| $\alpha_2$ | 2.217233                    | 43.489575  | -17.954174 | 0.107413  | -0.822735 | 5.407462  | 22.765636 |
| $\beta_2$  | -1.909653                   | -40.505792 | 18.701159  | -0.059390 | 0.004635  | -4.753808 | 21.685879 |
| $\gamma_2$ | 65.833893                   | 40.862476  | 42.676555  | 26.653905 | 70.097111 | 49.224788 | 18.260398 |

  

| Parameter | Radiation Model |          |          |          |          | Mean     | SD       |
|-----------|-----------------|----------|----------|----------|----------|----------|----------|
|           | Fold 1          | Fold 2   | Fold 3   | Fold 4   | Fold 5   |          |          |
| $\theta$  | 0.000686        | 0.000679 | 0.000678 | 0.000686 | 0.000680 | 0.000682 | 0.000004 |

  

| Parameter | Radiation with Selection Model |          |          |          |          | Mean     | SD       |
|-----------|--------------------------------|----------|----------|----------|----------|----------|----------|
|           | Fold 1                         | Fold 2   | Fold 3   | Fold 4   | Fold 5   |          |          |
| $\theta$  | 0.000686                       | 0.000679 | 0.000678 | 0.000686 | 0.000680 | 0.000682 | 0.000004 |
| $\lambda$ | 0.200000                       | 0.200000 | 0.200000 | 0.200000 | 0.200000 | 0.200000 | 0.000000 |

  

| Parameter | Intervening Opportunities Model |          |          |          |          | Mean     | SD       |
|-----------|---------------------------------|----------|----------|----------|----------|----------|----------|
|           | Fold 1                          | Fold 2   | Fold 3   | Fold 4   | Fold 5   |          |          |
| $\theta$  | 0.000675                        | 0.000682 | 0.000672 | 0.000681 | 0.000688 | 0.000680 | 0.000006 |
| $\lambda$ | 0.000008                        | 0.000008 | 0.000008 | 0.000008 | 0.000008 | 0.000008 | 0.000000 |

  

| Parameter | Ensemble Model |             |              |              |               | Mean         | SD          |
|-----------|----------------|-------------|--------------|--------------|---------------|--------------|-------------|
|           | Fold 1         | Fold 2      | Fold 3       | Fold 4       | Fold 5        |              |             |
| $\beta_0$ | 0.323295       | 0.319331    | -0.126461    | -0.086980    | -0.549702     | -0.024103    | 0.363771    |
| $\beta_1$ | 146.069958     | -370.370776 | 3988.255814  | 3856.287511  | 10321.942639  | 3588.437029  | 4274.744058 |
| $\beta_2$ | -145.821481    | 370.627518  | -3988.298730 | -3856.359020 | -10322.450208 | -3588.460384 | 4275.055525 |
| $\beta_3$ | -95.175511     | -92.090215  | -91.550018   | -91.245226   | -94.106685    | -92.833531   | 1.719624    |
| $\beta_4$ | 95.488359      | 92.393200   | 91.845396    | 91.553120    | 94.426560     | 93.141327    | 1.726406    |
| $\beta_5$ | 0.372478       | 0.389898    | 0.389353     | 0.376865     | 0.354898      | 0.376698     | 0.014383    |

**Table S8.** Estimated model parameters for 5-fold cross validation using Australian GPS Data

| Parameter  | Gravity Model                   |              |              |            |            | Mean       | SD         |
|------------|---------------------------------|--------------|--------------|------------|------------|------------|------------|
|            | Fold 1                          | Fold 2       | Fold 3       | Fold 4     | Fold 5     |            |            |
| $\theta$   | 366.546374                      | 386.255897   | 377.210694   | 320.708387 | 358.980130 | 361.940296 | 25.270943  |
| $\alpha$   | 0.567363                        | 0.558751     | 0.525975     | 0.546893   | 0.540320   | 0.547860   | 0.016091   |
| $\beta$    | 0.527396                        | 0.528001     | 0.563763     | 0.560560   | 0.558337   | 0.547611   | 0.018281   |
| $\gamma$   | 2.059716                        | 2.056153     | 2.057425     | 2.057797   | 2.061151   | 2.058449   | 0.001978   |
| Parameter  | Gravity with Distance Model     |              |              |            |            | Mean       | SD         |
|            | Fold 1                          | Fold 2       | Fold 3       | Fold 4     | Fold 5     |            |            |
| $\theta_1$ | 0.000000                        | 0.000000     | 0.000000     | 0.000000   | 0.000000   | 0.000000   | 0.000000   |
| $\alpha_1$ | 0.567434                        | 0.558594     | 0.525912     | 0.546551   | 0.540301   | 0.547759   | 0.016116   |
| $\beta_1$  | 0.528064                        | 0.527896     | 0.563830     | 0.560161   | 0.558346   | 0.547659   | 0.018073   |
| $\gamma_1$ | 2.059437                        | 2.056096     | 2.057072     | 2.057776   | 2.060957   | 2.058268   | 0.001936   |
| $\delta$   | 0.736052                        | 0.923615     | 0.989883     | 0.877521   | 0.968909   | 0.899196   | 0.100953   |
| $\theta_2$ | 0.000000                        | 0.000000     | 0.000000     | 0.000000   | 0.000000   | 0.000000   | 0.000000   |
| $\alpha_2$ | 10.246065                       | 6.819334     | 8.022712     | 4.402432   | -0.247364  | 5.848636   | 4.008085   |
| $\beta_2$  | 6.276850                        | 0.417435     | 0.615795     | -1.440286  | -0.582966  | 1.057366   | 3.032180   |
| $\gamma_2$ | 511.935000                      | 54.493099    | 57.045847    | 45.301051  | 42.771883  | 142.309376 | 206.714173 |
| Parameter  | Radiation Model                 |              |              |            |            | Mean       | SD         |
|            | Fold 1                          | Fold 2       | Fold 3       | Fold 4     | Fold 5     |            |            |
| $\theta$   | 0.000591                        | 0.000598     | 0.000597     | 0.000592   | 0.000590   | 0.000593   | 0.000004   |
| Parameter  | Radiation with Selection Model  |              |              |            |            | Mean       | SD         |
|            | Fold 1                          | Fold 2       | Fold 3       | Fold 4     | Fold 5     |            |            |
| $\theta$   | 0.000591                        | 0.000598     | 0.000595     | 0.000595   | 0.000589   | 0.000594   | 0.000004   |
| $\lambda$  | 0.999960                        | 0.999960     | 0.999960     | 0.999960   | 0.999960   | 0.999960   | 0.000000   |
| Parameter  | Intervening Opportunities Model |              |              |            |            | Mean       | SD         |
|            | Fold 1                          | Fold 2       | Fold 3       | Fold 4     | Fold 5     |            |            |
| $\theta$   | 0.000590                        | 0.000597     | 0.000594     | 0.000595   | 0.000589   | 0.000593   | 0.000003   |
| $\lambda$  | 0.000009                        | 0.000009     | 0.000009     | 0.000009   | 0.000009   | 0.000009   | 0.000000   |
| Parameter  | Ensemble Model                  |              |              |            |            | Mean       | SD         |
|            | Fold 1                          | Fold 2       | Fold 3       | Fold 4     | Fold 5     |            |            |
| $\beta_0$  | 0.319089                        | 0.450567     | 0.082933     | 0.315517   | 0.317712   | 0.297164   | 0.132917   |
| $\beta_1$  | 0.499518                        | -1226.486339 | 1279.527353  | -3.822397  | 3.851779   | 10.713983  | 886.131301 |
| $\beta_2$  | -0.184051                       | 1226.851794  | -1279.414453 | 4.142220   | -3.535845  | -10.428067 | 886.221281 |
| $\beta_3$  | -0.060965                       | -0.141012    | -0.173493    | -0.107246  | -0.087306  | -0.114004  | 0.044272   |
| $\beta_4$  | 0.634474                        | 0.790819     | 0.826235     | 0.705570   | 0.677866   | 0.726992   | 0.079616   |
| $\beta_5$  | 0.151634                        | 0.121927     | 0.120455     | 0.135735   | 0.142286   | 0.134408   | 0.013333   |
